# Supplementary material for: Persistence of neutrophil extracellular traps and anticardiolipin auto‐antibodies in post‐acute phase COVID‐19 patients
Source: PubMed Central journal article supplement (PMC9874393; doi:10.1002/jmv.28209), 2022-10-31
Supplement: JMV-95-e28209-s001.pdf [file JMV-95-e28209-s001.pdf]

**Table 1S. Characteristics of hospitalized patients at admittance**

|                               | Non-severe (n=26) | Severe (n=44)    | p-value |
|-------------------------------|-------------------|------------------|---------|
|                               | Median [min-max]  | Median [min-max] |         |
| Age (years)                   | 67 [39-83]        | 70 [18-81]       | NS      |
| Sex M/F; %M                   | 13/13; 50%        | 31/13; 70%       | NS      |
| BMI                           | 26 [22-40]        | 28 [18-43]       | NS      |
| Obesity(%)                    | 8 (31)            | 13 (30)          | NS      |
| Diabetes (%)                  | 17 (65)           | 14 (32)          | <0.05   |
| Hypertension (%)              | 19 (73)           | 21 (48)          | <0.05   |
| Cardiovascular disease (%)    | 10 (38)           | 13 (30)          | NS      |
| Dyslipidemia (%)              | 13 (50)           | 12 (27)          | NS      |
| CKD (%)                       | 4 (15)            | 3 (7)            | NA      |
| COPD (%)                      | 2 (8)             | 2 (5)            | NA      |
| Current smoking (%)           | 2 (8)             | 1 (2)            | NA      |
| Cancer (%)                    | 1 (4)             | 2 (5)            | NA      |
| Chronic immunosuppression (%) | 4 (15)            | 1 (2)            | NA      |
| Transplantation(%)            | 3 (12)            | 1 (2)            | NA      |

NS: no significative, NA: not applicabile (n<5)

**Table 2S. Characteristics of PAP individuals (n=42) at consultation for long term follow-up**

| PAP                             | median [min-max] | n (%)   |
|---------------------------------|------------------|---------|
| Age (years),                    | 66 [31-78]       |         |
| Sex M                           |                  | 39 (93) |
| BMI, median [min-max]           | 29 [21-41]       |         |
| Obesity, n (%)                  |                  | 20 (48) |
| Diabetes, n (%)                 |                  | 12 (29) |
| Hypertension, n (%)             |                  | 17 (40) |
| Pulmonary disease, n (%)        |                  | 7 (17)  |
| CKD, n (%)                      |                  | 7 (17)  |
| Autoimmune disease, n (%)       |                  | 1 (2.4) |
| Current smoking, n (%)          |                  | 2 (5)   |
| History of cancer, n (%)        |                  | 9 (21)  |
| Chronic immunosuppression n (%) |                  | 0 (0)   |
| Dyslipidemia, n (%)             |                  | 17 (40) |
| Transplantation, n (%)          |                  | 0 (0)   |

**Table 3S. Biological data of hospitalized patients at admittance**

|                                   | Non-severe (n=26) |             | Severe (n=44)    |             | p-value |
|-----------------------------------|-------------------|-------------|------------------|-------------|---------|
|                                   | Median [min-max]  |             | Median [min-max] |             |         |
| Creatinine (µmol/l)               | 67                | [41-182]    | 70               | [39-842]    | NS      |
| eDFG (ml/min/1,73m <sup>2</sup> ) | 90                | [25-116]    | 90               | [4-117]     | NS      |
| Uric acid (µmol/L)                | 318               | [124-608]   | 243              | [92-702]    | NS      |
| Albumin (g/l)                     | 34                | [28-44]     | 32               | [21-41]     | <0.05   |
| Corrected calcemia (mmol/l)       | 2.39              | [2.13-2.84] | 2.33             | [2.06-2.64] | <0.05   |
| Phosphate (mmol/l)                | 1.08              | [0.82-1.84] | 0.98             | [0.36-2.25] | NS      |
| Ferritine (µg/L)                  | 942               | [132- 6975] | 1070             | [175- 9311] | NS      |
| Total Bilirubin (µmol/L)          | 7                 | [2-12]      | 65               | [3-36]      | NS      |
| ASAT (UI/L)                       | 29                | [13- 146]   | 45               | [16-574]    | NS      |
| ALAT (UI/L)                       | 29                | [9-234]     | 29               | [9-488]     | NS      |
| ALP(UI/L)                         | 68                | [43-286]    | 75               | [37- 371]   | NS      |
| GGT(UI/L)                         | 51                | [12-309]    | 66               | [10- 460]   | NS      |
| LDH                               | 291               | [94-402]    | 427              | [161-2374]  | <0.01   |
| CRP (mg/L)                        | 44                | [4 -172]    | 94               | [6 -450]    | <0.001  |
| PCT (ng/l)                        | 0.1               | [0.05-1.64] | 0.21             | [0.02-133]  | NS      |
| HbA1c (%)                         | 7.0               | [5.5 -10.4] | 6.6              | [5.5 -10.3] | NS      |
| Hemoglobin (g/L)                  | 134               | [109-156]   | 129              | [98-166]    | NS      |
| Leukocytes (10 <sup>9</sup> /L)   | 5.8               | [1.4-10.9]  | 7.7              | [2.8-25.5]  | <0.01   |
| Neutrophil (10 <sup>9</sup> /L)   | 4.4               | [0.7-8.6]   | 6.3              | [1.4-22.9]  | <0.01   |
| Lymphocytes (10 <sup>9</sup> /L)  | 1.0               | [0.4-2.0]   | 0.9              | [0.3-2.3]   | NS      |
| Thrombocytes (10 <sup>9</sup> /L) | 251               | [148-543]   | 248              | [113-655]   | NS      |
| Fibrinogen (g/L)                  | 5.1               | [2.9-8.0]   | 5.9              | [0.8-9.1]   | NS      |
| D-Dimer (ng/mL)                   | 751               | [372-2583]  | 1009             | [309-3649]  | NS      |
| a-CL IgM (UI/L)                   | 2                 | [1-15]      | 1                | [1-20]      | NS      |
| a-CL IgG (UI/L)                   | 1                 | [1-3]       | 1                | [1-11]      | NS      |
| a-B2GP1 IgM (UI/L)                | 1                 | [1-11]      | 1                | [1-30]      | NS      |
| a-B2GP1 IgG (UI/L)                | 1                 | [1-6]       | 1                | [1-7]       | NS      |
| a-CL (> 40), n (%)                | 0 (0)             |             | 0 (0)            |             | NS      |
| a-B2GPI (> 40), n (%)             | 0 (0)             |             | 0 (0)            |             | NS      |

**Table 4S. Biological data of PAP population at consultation for long term follow-up (n=42)**

|                                   | Median [min-max] | Outer the reference range, n (%) | Reference range     |
|-----------------------------------|------------------|----------------------------------|---------------------|
| Creatinine (µmol/l)               | 85 [38-138]      | 9 (21)                           | M: 59-104 F: 45-84  |
| eDFG (ml/min/1,73m <sup>2</sup> ) | 85 [44-120]      | 7 (17)                           | >=60                |
| Albumin (g/l)                     | 43 [37-52]       | 0 (0)                            | 35-52               |
| Ferritine (µg/L)                  | 177 [23-1797]    | 9 (21)                           | M:30-400 F: 20-200  |
| Total bilirubin (µmol/L)          | 8 [4-53]         | 1 (2)                            | <21                 |
| ASAT (UI/L)                       | 20 [12-112]      | 1 (2)                            | M: <40 F:< 32       |
| ALAT (UI/L)                       | 18 [7-215]       | 5 (12)                           | M: <41 F:< 33       |
| ALP(UI/L)                         | 67 [31-143]      | 1 (2)                            | M:<130 F:<105       |
| GGT(UI/L)                         | 29 [11-145]      | 8 (19)                           | M: <60 F:< 40       |
| CRP (mg/L)                        | 2.1 [0.3-47.9]   | 8 (19)                           | <5                  |
| HbA1c (%)                         | 6.0 [4.7-10]     | 29 (69)                          | > 5.7               |
| Hemoglobin (g/L)                  | 14.8 [12.5-17.6] | 3 (6)                            | M:130-180 F:120-160 |
| Leukocytes (10 <sup>9</sup> /L)   | 5.9 [2.4-11.0]   | 7 (17)                           | 4.0-10.0            |
| Neutrophil (10 <sup>9</sup> /L)   | 3.2 [1.1-5.3]    | 4 (10)                           | 2.0-7.5             |
| Lymphocytes (10 <sup>9</sup> /L)  | 1.9 [0.6-6.6]    | 4 (10)                           | 1.0-4.0             |
| Thrombocytes (10 <sup>9</sup> /L) | 210 [139-392]    | 3 (7)                            | 150-400             |
| Fibrinogen (g/L)                  | 3.4 [2.3-4.4]    | 7 (17)                           | 1.9-4.0             |
| Lupus anticoagulant, n (%)        | 3 (7)            |                                  | -                   |
| a-CL IgM (UI/L)                   | 1.0 [1.0-6.0]    | 0 (0)                            | <7                  |
| a-CL IgG (UI/L)                   | 1.0 [1.0-6.0]    | 0 (0)                            | <10                 |
| a-B2GP1 IgM (UI/L)                | 1.0 [1.0-7.0]    | 2 (5)                            | <5                  |
| a-B2GP1 IgG (UI/L)                | 1.0 [1.0-20]     | 2 (5)                            | <5                  |
| a-CL (> 40) n (%)                 | 0 (0)            |                                  |                     |
| a-B2GPI (> 40), n (%)             | 0 (0)            |                                  |                     |

**Table 5S. Post-COVID events and manifestations in the PAP population (n=42)**

|                                           | All, n (%)       | Resolutive, n (%) |
|-------------------------------------------|------------------|-------------------|
| <b><u>General manifestations</u></b>      | <b>36 (85.7)</b> |                   |
| Asthenia                                  | 32 (76.2)        | 11 (26.2)         |
| Loss of weight (after discharge)          | 7 (16.7)         |                   |
| Fever/Sweating/ Chills                    | 1 (2.4)          |                   |
| <b><u>Neurological manifestations</u></b> | <b>20 (47.6)</b> |                   |
| Headache                                  | 2 (4.8)          |                   |
| Loss of memory                            | 5 (11.9)         | 1 (2.4)           |
| Attention disorders                       | 8 (19.0)         | 1 (2.4)           |
| Sleep disorders                           | 9 (21.4)         |                   |
| Depression                                | 7 (16.7)         |                   |
| <b><u>Cardio-thoracic symptoms</u></b>    | <b>23 (54.8)</b> |                   |
| Dyspnea                                   | 18 (42.9)        | 2 (4.8)           |
| Chest pain                                | 8 (19.0)         | 2 (4.8)           |
| Palpitation                               | 3 (7.1)          | 1 (2.4)           |
| Cough                                     | 3 (7.1)          |                   |
| <b><u>ENT disorders</u></b>               | <b>6 (14.3)</b>  |                   |
| Ageusia                                   | 2 (4.8)          | 1 (2.4)           |
| Anosmia                                   | 6 (14.3)         | 2 (4.8)           |
| <b><u>Musculoskeletal disorders</u></b>   | <b>30 (71.4)</b> |                   |
| Muscle weakness                           | 24 (57.1)        | 19 (45.2)         |
| Arthralgia                                | 16 (38.1)        | 2 (4.8)           |
| <b><u>Gastro-intestinal disorders</u></b> | <b>10 (23.8)</b> |                   |
| Gastro-intestinal bleeding                | 2 (4.8)          | 2 (4.8)           |
| Constipation                              | 5 (11.9)         |                   |
| Biliary tract disease                     | 3 (7.1)          |                   |
| <b><u>Abbreviations :</u></b>             |                  |                   |
| ENT : Ears Nose Throat                    |                  |                   |

**Table 6S. Values of NETs biomarkers for non-severe COVID-19 patients**

| Cohort                            | Sample        | NE<br>[ng/ml] | MPO<br>[ng/ml] | cir-nDNA<br>[ng/ml] | cir-mtDNA<br>[ng/ml] | MNR             |
|-----------------------------------|---------------|---------------|----------------|---------------------|----------------------|-----------------|
| <b>NON-<br/>SEVERE<br/>(N=26)</b> | M09           | 60.1          | 106.9          | 110                 | 0.016                | 1.44E+02        |
|                                   | M15           | 32.7          | 50.1           | 57                  | 0.007                | 1.31E+02        |
|                                   | M18           | 44.6          | 74.3           | 264                 | 0.063                | 2.35E+02        |
|                                   | M35           | 14.6          | 30.2           | 5                   | 0.003                | 6.94E+02        |
|                                   | M39           | 34.9          | 42.5           | 7                   | 0.001                | 8.41E+01        |
|                                   | M40           | 45.9          | 104.4          | 93                  | 0.019                | 2.06E+02        |
|                                   | M41           | 28.1          | 75.2           | 128                 | 0.012                | 9.45E+01        |
|                                   | M45           | 56.3          | 117.2          | 188                 | 0.044                | 2.30E+02        |
|                                   | M52           | 22.5          | 45.9           | 11                  | 0.005                | 4.64E+02        |
|                                   | M11           | 25.9          | 85.3           | 62                  | 0.004                | 6.37E+01        |
|                                   | M14           | 40.0          | 79.4           | 28                  | 0.004                | 1.52E+02        |
|                                   | M53           | 62.6          | 57.5           | 73                  | 0.005                | 7.23E+01        |
|                                   | M55           | 77.1          | 61.7           | 14                  | 0.016                | 1.15E+03        |
|                                   | M65           | 31.7          | 50.5           | 206                 | 0.032                | 1.55E+02        |
|                                   | M30           | 46.0          | 43.1           | 67                  | 0.005                | 7.46E+01        |
|                                   | M69           | 56.3          | 43.9           | 190                 | 0.015                | 7.75E+01        |
|                                   | M76           | 45.1          | 60.9           | 70                  | 0.072                | 1.02E+03        |
|                                   | M81           | 40.4          | 67.3           | 27                  | 0.004                | 1.63E+02        |
|                                   | M51           | 36.2          | 107.3          | 137                 | 0.015                | 1.06E+02        |
|                                   | M61           | 22.5          | 39.5           | 6                   | 0.033                | 5.76E+03        |
|                                   | M17           | 72.4          | 127.9          | 119                 | 0.017                | 1.39E+02        |
|                                   | M25           | 59.2          | 64.0           | 41                  | 0.005                | 1.18E+02        |
|                                   | M50           | 18.1          | 68.2           | 71                  | 0.017                | 2.41E+02        |
|                                   | M54           | 29.8          | 39.9           | 166                 | 0.011                | 6.66E+01        |
|                                   | M 60          | 45.6          | 74.9           | 23                  | 0.005                | 1.94E+02        |
|                                   | M 68          | 46.7          | 64.5           | 18                  | 0.022                | 1.22E+03        |
|                                   | <b>MEAN</b>   | <b>42.1</b>   | <b>68.6</b>    | <b>83.9</b>         | <b>0.017</b>         | <b>5.02E+02</b> |
|                                   | <b>MEDIAN</b> | <b>42.5</b>   | <b>64.2</b>    | <b>68.6</b>         | <b>0.013</b>         | <b>1.54E+02</b> |
|                                   | <b>SD</b>     | <b>16.3</b>   | <b>26.2</b>    | <b>72.0</b>         | <b>0.018</b>         | <b>1.12E+03</b> |
| <b>Healthy<br/>(N=117)</b>        | <b>MEAN</b>   | <b>14.6</b>   | <b>14.3</b>    | <b>6.1</b>          | <b>0.405</b>         | <b>9.27E+04</b> |
|                                   | <b>MEDIAN</b> | <b>12.9</b>   | <b>12.2</b>    | <b>5.9</b>          | <b>0.277</b>         | <b>5.65E+04</b> |
|                                   | <b>SD</b>     | <b>8.3</b>    | <b>10.1</b>    | <b>2.6</b>          | <b>0.373</b>         | <b>1.11E+05</b> |

**Legend:** Manifestations of possible NETs formation in NS, S and PAP cohorts appear frequent, given that 100%, 100% and 90.5% of plasma showed NE, MPO and cir-nDNA levels which were above the healthy median level, and given that 92.4%, 100% and 71% of plasma showed at least two out of the three markers at a level more than double the healthy median level, respectively.

**Table 7S. Values of NETs biomarkers for severe COVID-19 patients**

| Cohort                     | Sample        | NE [ng/ml]  | MPO [ng/ml]  | cir-nDNA [ng/ml] | cir-mtDNA [ng/ml] | MNR             |
|----------------------------|---------------|-------------|--------------|------------------|-------------------|-----------------|
| <b>SEVERE<br/>(N=44)</b>   | R03           | 108.2       | 184.9        | 529              | 0.106             | 1.98E+02        |
|                            | R04           | 126.7       | 181.2        | 458              | 0.473             | 1.02E+03        |
|                            | R06           | 86.7        | 98.3         | 334              | 0.154             | 4.56E+02        |
|                            | R08           | 71.7        | 83.4         | 312              | 0.178             | 5.65E+02        |
|                            | R09           | 31.2        | 112.9        | 196              | 0.059             | 2.95E+02        |
|                            | R11           | 44.7        | 55.2         | 76               | 0.013             | 1.65E+02        |
|                            | R12           | 46.0        | 56.7         | 76               | 0.008             | 9.91E+01        |
|                            | R15           | 28.1        | 113.9        | 305              | 0.037             | 1.21E+02        |
|                            | R16           | 194.3       | 111.1        | 114              | 0.022             | 1.94E+02        |
|                            | R19           | 202.0       | 194.0        | 239              | 0.036             | 1.48E+02        |
|                            | R20           | 168.5       | 172.1        | 885              | 0.112             | 1.25E+02        |
|                            | R21           | 70.9        | 130.6        | 55               | 0.011             | 1.89E+02        |
|                            | R32           | 41.7        | 160.6        | 165              | 0.046             | 2.79E+02        |
|                            | R29           | 63.3        | 125.2        | 155              | 0.017             | 1.07E+02        |
|                            | R33           | 97.8        | 115.4        | 366              | 0.086             | 2.32E+02        |
|                            | R35           | 85.3        | 94.3         | 199              | 0.027             | 1.36E+02        |
|                            | R37           | 74.6        | 93.9         | 207              | 0.024             | 1.13E+02        |
|                            | R38           | 115.2       | 85.1         | 328              | 0.012             | 3.63E+01        |
|                            | R39           | 128.5       | 75.3         | 21               | 0.003             | 1.33E+02        |
|                            | R42           | 87.4        | 63.6         | 137              | 0.040             | 2.90E+02        |
|                            | R44           | 48.3        | 88.9         | 22               | 0.007             | 3.30E+02        |
|                            | R49           | 43.4        | 77.0         | 72               | 0.021             | 2.94E+02        |
|                            | R51           | 64.8        | 115.5        | 476              | 0.037             | 7.64E+01        |
|                            | R53           | 36.4        | 109.6        | 123              | 0.032             | 2.57E+02        |
|                            | R55           | 132.7       | 193.9        | 800              | 0.276             | 3.42E+02        |
|                            | R56           | 48.0        | 81.0         | 349              | 0.056             | 1.58E+02        |
|                            | R01           | 76.5        | 136.0        | 26               | 0.024             | 8.87E+02        |
|                            | R13           | 159.9       | 205.1        | 81               | 0.038             | 4.66E+02        |
|                            | R22           | 51.8        | 105.3        | 38               | 0.056             | 1.48E+03        |
|                            | R23           | 124.4       | 140.8        | 68               | 0.013             | 1.93E+02        |
|                            | R24           | 122.1       | 116.4        | 91               | 0.033             | 3.58E+02        |
|                            | R25           | 172.7       | 143.7        | 226              | 0.072             | 3.16E+02        |
|                            | R26           | 172.3       | 199.8        | 79               | 0.086             | 1.08E+03        |
|                            | R36           | 117.8       | 199.0        | 48               | 0.079             | 1.63E+03        |
|                            | R46           | 104.5       | 199.8        | 167              | 0.059             | 3.51E+02        |
|                            | M12           | 62.3        | 68.3         | 234              | 0.023             | 9.70E+01        |
|                            | M21           | 14.5        | 26.1         | 17               | 0.019             | 1.07E+03        |
|                            | M38           | 33.9        | 74.8         | 118              | 0.011             | 9.33E+01        |
|                            | M44           | 13.3        | 26.0         | 9                | 0.009             | 9.34E+02        |
|                            | M49           |             |              | 32               | 0.019             | 5.87E+02        |
|                            | M56           | 51.7        | 76.9         | 34               | 0.018             | 5.19E+02        |
|                            | M74           | 63.6        | 114.4        | 221              | 0.020             | 8.93E+01        |
|                            | M82           | 81.1        | 125.2        | 133              | 0.017             | 1.26E+02        |
|                            | M83           | 70.1        | 79.0         | 132              | 0.009             | 6.53E+01        |
|                            | <b>MEAN</b>   | <b>86.9</b> | <b>116.5</b> | <b>199.0</b>     | <b>0.057</b>      | <b>3.80E+02</b> |
|                            | <b>MEDIAN</b> | <b>74.6</b> | <b>112.9</b> | <b>134.9</b>     | <b>0.030</b>      | <b>2.44E+02</b> |
|                            | <b>SD</b>     | <b>49.0</b> | <b>48.5</b>  | <b>194.3</b>     | <b>0.083</b>      | <b>3.82E+02</b> |
| <b>Healthy<br/>(N=117)</b> | <b>MEAN</b>   | <b>14.6</b> | <b>14.3</b>  | <b>6.1</b>       | <b>0.405</b>      | <b>9.27E+04</b> |
|                            | <b>MEDIAN</b> | <b>12.9</b> | <b>12.2</b>  | <b>5.9</b>       | <b>0.277</b>      | <b>5.65E+04</b> |
|                            | <b>SD</b>     | <b>8.3</b>  | <b>10.1</b>  | <b>2.6</b>       | <b>0.373</b>      | <b>1.11E+05</b> |

**Table 8S. Values of NETs biomarkers for post-acute phase (PAP) COVID-19 cohort**

| Cohort             | Sample        | NE [ng/ml]  | MPO [ng/ml] | cir-nDNA [ng/ml] | cir-mtDNA [ng/ml] | MNR             |
|--------------------|---------------|-------------|-------------|------------------|-------------------|-----------------|
| PAP<br>(N=42)      | M01           | 22.9        | 29.5        | 16               | 0.027             | 1.73E+03        |
|                    | M02           | 25.8        | 29.0        | 20               | 0.055             | 2.72E+03        |
|                    | M07           | 22.1        | 29.0        | 25               | 0.062             | 2.49E+03        |
|                    | M13           | 32.1        | 43.6        | 35               | 0.119             | 3.38E+03        |
|                    | M23           | 24.7        | 60.1        | 20               | 0.042             | 2.09E+03        |
|                    | M29           | 38.9        | 53.0        | 14               | 0.091             | 6.34E+03        |
|                    | M04           | 19.5        | 31.6        | 12               | 0.088             | 7.22E+03        |
|                    | M42           | 23.4        | 48.3        | 14               | 0.108             | 7.65E+03        |
|                    | M47           | 36.1        | 25.3        | 9                | 0.034             | 3.62E+03        |
|                    | M62           | 23.6        | 17.9        | 6                | 0.017             | 2.98E+03        |
|                    | M77           | 24.5        | 35.4        | 15               | 0.015             | 1.04E+03        |
|                    | M79           | 18.7        | 17.1        | 4                | 0.024             | 5.99E+03        |
|                    | PA01          | 14.8        | 12.6        | 13               | 0.031             | 2.40E+03        |
|                    | PA02          | 11.4        | 10.8        | 10               | 0.224             | 2.16E+04        |
|                    | PA03          | 30.4        | 20.4        | 37               | 0.064             | 1.71E+03        |
|                    | PA04          | 15.9        | 21.3        | 17               | 0.025             | 1.45E+03        |
|                    | PA05          | 27.6        | 31.5        | 11               | 0.616             | 5.58E+04        |
|                    | PA06          | 24.8        | 51.7        | 31               | 0.155             | 5.00E+03        |
|                    | PA07          | 19.1        | 21.6        | 16               | 0.815             | 5.09E+04        |
|                    | PA08          | 30.8        | 52.7        | 30               | 0.236             | 7.83E+03        |
|                    | PA09          | 20.8        | 25.9        | 6                | 0.090             | 1.56E+04        |
|                    | PA10          | 10.3        | 31.9        | 26               | 0.012             | 4.54E+02        |
|                    | PA11          | 5.8         | 25.4        | 19               | 0.519             | 2.67E+04        |
|                    | PA12          | 10.7        | 18.8        | 12               | 0.716             | 5.74E+04        |
|                    | PA13          | 10.0        | 23.7        | 18               | 0.069             | 3.69E+03        |
|                    | PA14          | 17.1        | 48.3        | 33               | 0.015             | 4.59E+02        |
|                    | PA15          | 13.7        | 26.8        | 12               | 0.074             | 6.21E+03        |
|                    | PA16          | 18.1        | 49.5        | 18               | 0.251             | 1.35E+04        |
|                    | PA17          | 11.8        | 8.6         | 11               | 0.004             | 3.95E+02        |
|                    | PA18          | 15.4        | 16.0        | 33               | 0.017             | 5.16E+02        |
|                    | PA19          | 16.4        | 25.9        | 19               | 0.014             | 7.45E+02        |
|                    | PA20          | 8.7         | 21.7        | 13               | 0.279             | 2.15E+04        |
|                    | PA21          | 5.8         | 12.5        | 14               | 0.017             | 1.23E+03        |
| PA22               | 9.9           | 19.4        | 21          | 0.004            | 1.96E+02          |                 |
| PA23               | 13.6          | 16.3        | 12          | 0.012            | 1.01E+03          |                 |
| PA24               | 12.6          | 35.3        | 25          | 0.008            | 3.00E+02          |                 |
| PA25               | 0.6           | 1.6         | 7           | 0.005            | 7.76E+02          |                 |
| PA26               | 14.9          | 25.9        | 7           | 0.088            | 1.28E+04          |                 |
| PA27               | 8.1           | 15.1        | 10          | 0.006            | 5.34E+02          |                 |
| PA28               | 11.9          | 4.7         | 12          | 0.006            | 4.81E+02          |                 |
| PA29               | 42.9          | 71.6        | 51          | 0.060            | 1.17E+03          |                 |
| PA30               | 8.9           | 15.0        | 25          | 0.005            | 1.90E+02          |                 |
|                    | <b>MEAN</b>   | <b>18.5</b> | <b>28.1</b> | <b>18.0</b>      | <b>0.122</b>      | <b>8.57E+03</b> |
|                    | <b>MEDIAN</b> | <b>16.8</b> | <b>25.7</b> | <b>15.2</b>      | <b>0.048</b>      | <b>2.61E+03</b> |
|                    | <b>SD</b>     | <b>9.4</b>  | <b>15.6</b> | <b>10.0</b>      | <b>0.195</b>      | <b>1.44E+04</b> |
| Healthy<br>(N=117) | <b>MEAN</b>   | <b>14.6</b> | <b>14.3</b> | <b>6.1</b>       | <b>0.405</b>      | <b>9.27E+04</b> |
|                    | <b>MEDIAN</b> | <b>12.9</b> | <b>12.2</b> | <b>5.9</b>       | <b>0.277</b>      | <b>5.65E+04</b> |
|                    | <b>SD</b>     | <b>8.3</b>  | <b>10.1</b> | <b>2.6</b>       | <b>0.373</b>      | <b>1.11E+05</b> |

**Table 9S. Summary data of NETs biomarkers for COVID-19 patients and PAP subjects.**

|                          | Non-severe (N=26) |          |          | Severe (N=44) |          |          | PAP (N=42) |          |          |
|--------------------------|-------------------|----------|----------|---------------|----------|----------|------------|----------|----------|
|                          | MEAN              | MEDIAN   | SD       | MEAN          | MEDIAN   | SD       | MEAN       | MEDIAN   | SD       |
| <b>NE [ng/ml]</b>        | 42.1              | 42.5     | 16.3     | 86.9          | 74.6     | 49.0     | 18.5       | 16.8     | 9.4      |
| <b>MPO [ng/ml]</b>       | 68.6              | 64.2     | 26.2     | 116.5         | 112.9    | 48.5     | 28.1       | 25.7     | 15.6     |
| <b>cir-nDNA [ng/ml]</b>  | 83.9              | 68.6     | 72.0     | 199.0         | 134.9    | 194.3    | 18.0       | 15.2     | 10.0     |
| <b>cir-mtDNA [ng/ml]</b> | 0.017             | 0.013    | 0.018    | 0.057         | 0.030    | 0.083    | 0.122      | 0.048    | 0.195    |
| <b>MNR</b>               | 5.02E+02          | 1.54E+02 | 1.12E+03 | 3.80E+02      | 2.44E+02 | 3.82E+02 | 8.57E+03   | 2.61E+03 | 1.44E+04 |

**Table 10S. Comparison of NETs biomarkers in COVID-19 patients (S: severe; NS: non-severe), post-acute phase (PAP) and healthy individuals (HI)**

(+) X fold higher

(-) X fold lower

| NET marker | S vs HI   | NS vs HI  | PAP vs HI | S vs NS |
|------------|-----------|-----------|-----------|---------|
| NE         | (+) 5.8   | (+) 3.3   | (+) 1.3   | (+) 1.8 |
| MPO        | (+) 9.3   | (+) 5.3   | (+) 2.1   | (+) 1.8 |
| cir-nDNA   | (+) 22.9  | (+) 11.6  | (+) 2.6   | (+) 2   |
| cir-mtDNA  | (-) 9.2   | (-) 21.3  | (-) 5.8   | (+) 2.3 |
| MNR        | (-) 231.6 | (-) 366.9 | (-) 21.6  | (+) 1.6 |



**Table 11S. Comparison of Fibrinogen, Thrombocytes, and Hemoglobin plasma concentration in COVID-19 patients (S: severe; NS: non-severe) and Post-Acute hasse individuals (PAP).**

Fibrinogen is highly elevated in NS and S patients while being slightly elevated in PAP individuals. Thrombocytes number is moderately elevated in NS and S patients while being normalized in PAP individuals. Hemoglobin concentration is within the reference range in NS, very slightly elevated in S patients and statistically more elevated in PAP individuals. Data seem to show that Fibrinogen and Thrombocytes coagulation factors are statistically more elevated in NS and S COVID-19 patients while a bleeding marker such as Hemoglobin is statistically more elevated in PAP subjects.

### Fibrinogen

Number of subjects out the reference range (>4.0 g/L):

18 NS (69%)

39 S (89%)

7 PAP (17%)

### Thrombocytes

Number of subjects out the reference range (>400 10<sup>9</sup>/L):

3 NS (12%)

9 S (20%)

0 PAP

### Hemoglobin

Number of subjects out the reference range (>16 g/dL):

0 NS

2 S (5%)

3 PAP (7%)

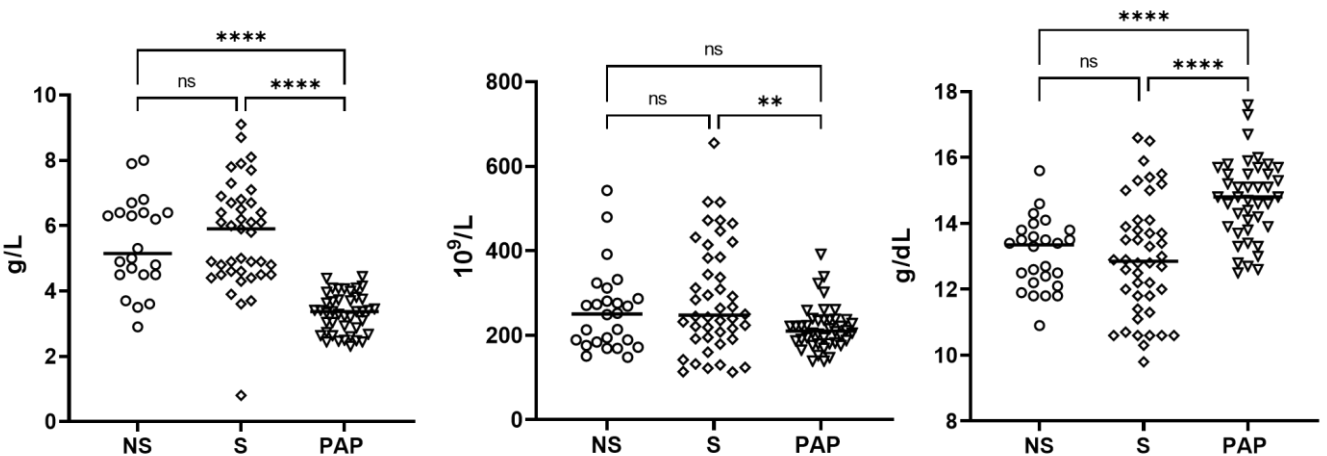

**Figure 1S. Associations of NETs markers with biochemical parameters.** Correlation matrix of NETs markers concentrations (NE, MPO, cir-nDNA, cir-mtDNA, MNR) with biochemical parameters for non-severe (A), severe (B), post-acute phase (PAP) (C) and all (D) COVID-19 patients. Heatmap manifests the strength of the relationship by Pearson's correlation analysis (red: positive correlation; blue: negative correlation).

**A**

**Severe COVID-19**

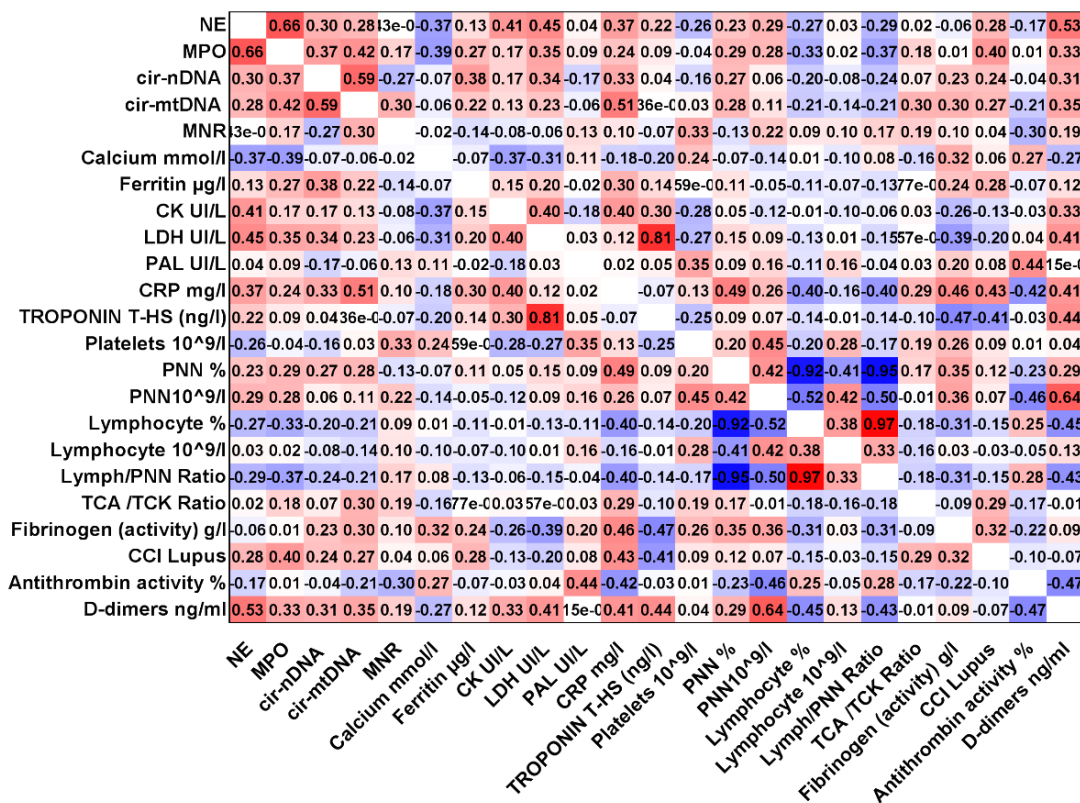

**B**

**Non-severe COVID-19**

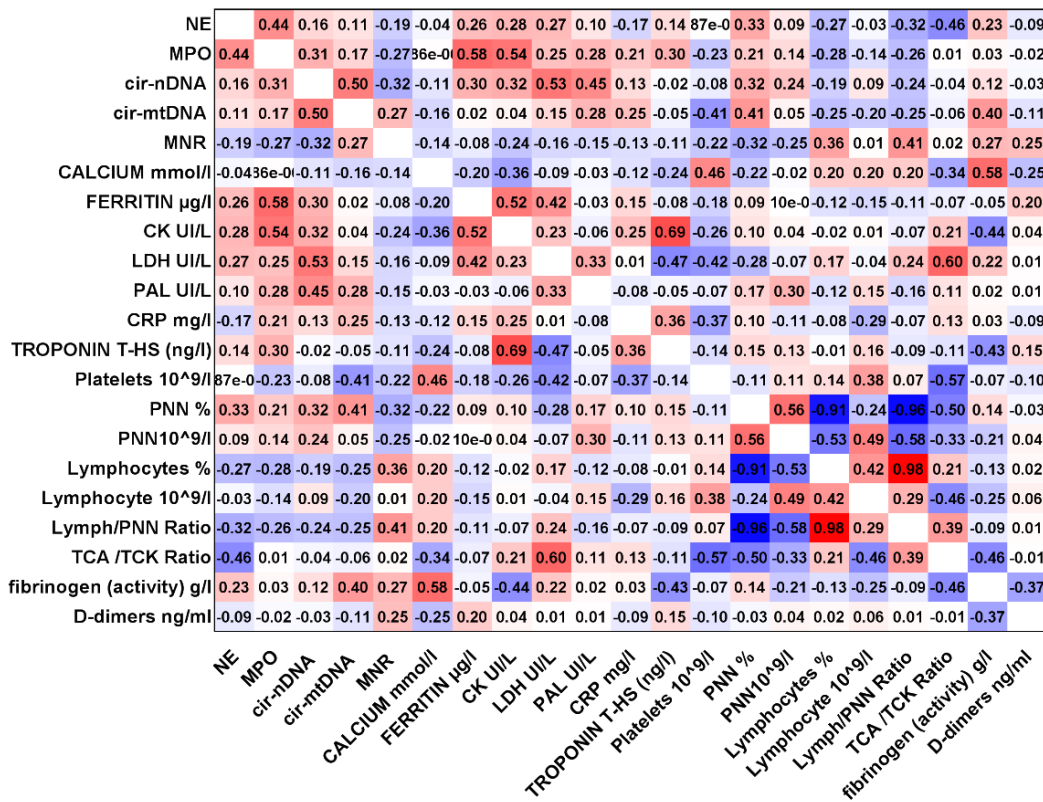

### PAP COVID-19

C

|                           |       |       |       |       |       |       |       |       |       |       |       |       |       |       |       |       |       |       |       |       |       |       |
|---------------------------|-------|-------|-------|-------|-------|-------|-------|-------|-------|-------|-------|-------|-------|-------|-------|-------|-------|-------|-------|-------|-------|-------|
| NE                        |       | 0.68  | 0.39  | 28e-0 | -0.04 | 0.13  | 0.06  | 0.41  | -0.03 | 0.03  | -0.52 | -0.07 | 0.04  | 0.22  | 0.04  | 0.19  | 0.03  | 0.32  | 0.24  | 0.33  | -0.16 | -0.20 |
| MPO                       | 0.68  |       | 0.56  | 0.04  | -0.05 | -0.25 | 0.08  | 0.98  | -0.12 | 0.08  | -0.20 | -0.19 | 0.19  | 0.47  | -0.18 | 0.17  | -0.18 | 0.18  | 0.27  | 0.06  | -0.01 | 0.06  |
| cir-nDNA                  | 0.39  | 0.56  |       | -0.09 | -0.24 | -0.99 | 0.12  | 0.90  | -0.24 | 0.00  | 0.39  | -0.21 | 0.01  | 0.10  | 0.04  | -0.01 | -0.03 | 0.07  | 0.08  | -0.17 | -0.18 | -0.10 |
| cir-mtDNA                 | 28e-0 | 0.04  | -0.09 |       | 0.96  | 0.94  | -0.08 | -0.93 | -0.04 | -0.08 | -0.55 | 0.06  | -0.16 | 0.15  | 0.25  | 0.40  | 0.32  | -0.13 | 0.14  | -0.11 | -0.14 | 0.01  |
| MNR                       | -0.04 | -0.05 | -0.24 | 0.96  |       | 0.88  | -0.09 | -0.77 | -0.04 | -0.08 | -0.56 | 0.10  | -0.20 | 0.11  | 0.27  | 0.45  | 0.39  | -0.14 | 0.07  | -0.10 | -0.05 | 0.01  |
| Calcium mmol/l            | 0.13  | -0.25 | -0.99 | 0.94  | 0.88  |       | -0.79 | -0.18 | 0.53  |       | 0.26  | 0.01  | -0.18 | -0.16 | -0.23 | -0.11 | -0.37 | 0.74  |       |       | 0.93  |       |
| Ferritin µg/l             | 0.06  | 0.08  | 0.12  | -0.08 | -0.09 | -0.79 |       | 1.00  | -0.13 | 0.15  | -0.36 | 18e-0 | 0.19  | 0.13  | -0.18 | -0.05 | -0.19 | 0.07  | 0.16  | 0.01  | 56e-0 | 0.12  |
| CK UI/L                   | 0.41  | 0.98  | 0.90  | -0.93 | -0.77 |       | 1.00  |       | 0.83  | 0.44  |       | -0.46 | -0.60 | 0.89  | 0.21  | 0.96  | 0.40  | 0.76  | -0.53 |       |       | -0.77 |
| PAL UI/L                  | -0.03 | -0.12 | -0.24 | -0.04 | -0.04 | -0.18 | -0.13 | 0.83  |       | 0.04  | 0.34  | 0.13  | 0.08  | -0.03 | -0.08 | -0.07 | -0.09 | -0.05 | 0.05  | -0.04 | -0.28 | -0.30 |
| CRP mg/l                  | 0.03  | 0.08  | 30e-0 | -0.08 | -0.08 | 0.53  | 0.15  | 0.44  | 0.04  |       | 0.02  | -0.10 | 0.10  | -0.12 | -0.15 | -0.12 | -0.12 | 0.10  | 0.41  | 0.03  | 0.01  | 0.18  |
| TROPONIN T-HS (ng/l)      | -0.52 | -0.20 | 0.39  | -0.55 | -0.56 |       | -0.36 |       | 0.34  | 0.02  |       | -0.72 | -0.43 | 0.27  | 0.26  | 0.37  | 0.27  | -0.80 | -0.68 | 0.14  |       | 0.55  |
| Platelets 10^9/l          | -0.07 | -0.19 | -0.21 | 0.06  | 0.10  | 0.26  | 18e-0 | -0.46 | 0.13  | -0.10 | 0.72  |       | 0.06  | 0.23  | -0.14 | 0.09  | -0.10 | 0.02  | -0.12 | 0.18  | 0.29  | -0.54 |
| PNN %                     | 0.04  | 0.19  | 0.01  | -0.16 | -0.20 | 0.01  | 0.19  | -0.60 | 0.08  | 0.10  | -0.43 | 0.06  |       | 0.44  | -0.93 | -0.65 | -0.93 | -0.04 | 0.25  | 0.05  | 0.11  | 0.03  |
| PNN10^9/l                 | 0.22  | 0.47  | 0.10  | 0.15  | 0.11  | -0.18 | 0.13  | 0.89  | -0.03 | -0.12 | 0.27  | 0.23  | 0.44  |       | -0.43 | 0.27  | -0.39 | -0.14 | 0.29  | 0.17  | 0.22  | 0.01  |
| Lymphocyte %              | 0.04  | -0.18 | 0.04  | 0.25  | 0.27  | -0.16 | -0.18 | 0.21  | -0.08 | -0.15 | 0.26  | -0.14 | -0.93 | -0.43 |       | 0.67  | 0.96  | 0.02  | -0.21 | -0.01 | -0.11 | -0.08 |
| Lymphocyte 10^9/l         | 0.19  | 0.17  | -0.01 | 0.40  | 0.45  | -0.23 | -0.05 | 0.96  | -0.07 | -0.12 | 0.37  | 0.09  | -0.65 | 0.27  | 0.67  |       | 0.73  | -0.09 | -0.04 | 0.08  | 0.04  | 0.04  |
| Lymph/PNN Ratio           | 0.03  | -0.18 | -0.03 | 0.32  | 0.39  | -0.11 | -0.19 | 0.40  | -0.09 | -0.12 | 0.27  | -0.10 | -0.93 | -0.39 | 0.96  | 0.73  |       | 39e-0 | -0.20 | -0.06 | -0.07 | -0.05 |
| TCA /TCK Ratio            | 0.32  | 0.18  | 0.07  | -0.13 | -0.14 | -0.37 | 0.07  | 0.76  | -0.05 | 0.10  | -0.80 | 0.02  | -0.04 | -0.14 | 0.02  | -0.09 | 39e-0 |       | 0.20  | 0.22  | -0.14 | 0.02  |
| fibrinogen (activity) g/l | 0.24  | 0.27  | 0.08  | 0.14  | 0.07  | 0.74  | 0.16  | -0.53 | 0.05  | 0.41  | -0.68 | -0.12 | 0.25  | 0.29  | -0.21 | -0.04 | -0.20 | 0.20  |       | 0.25  | -0.08 | 0.11  |
| CCI Lupus                 | 0.33  | 0.06  | -0.17 | -0.11 | -0.10 |       | 0.01  |       | -0.04 | 0.03  | 0.14  | 0.18  | 0.05  | 0.17  | -0.01 | 0.08  | -0.06 | 0.22  | 0.25  |       | -0.04 | -0.06 |
| aCL AI                    | -0.16 | -0.01 | -0.18 | -0.14 | -0.05 |       | 56e-0 |       | -0.28 | 0.01  |       | 0.29  | 0.11  | 0.22  | -0.11 | 0.04  | -0.07 | -0.14 | -0.08 | -0.04 |       | -0.15 |
| Age                       | -0.20 | 0.06  | -0.10 | 0.01  | 0.01  | 0.93  | 0.12  | -0.77 | -0.30 | 0.18  | 0.55  | -0.54 | 0.03  | 0.01  | -0.08 | 0.04  | -0.05 | 0.02  | 0.11  | -0.06 | -0.15 |       |

D

### Non-severe and severe COVID-19

|                           |       |       |       |       |       |       |       |       |       |       |       |       |       |       |       |       |       |       |       |       |       |       |       |
|---------------------------|-------|-------|-------|-------|-------|-------|-------|-------|-------|-------|-------|-------|-------|-------|-------|-------|-------|-------|-------|-------|-------|-------|-------|
| NE                        |       | 0.72  | 0.40  | 0.36  | -0.08 | -0.46 | 0.15  | 0.45  | 0.53  | 0.08  | 0.46  | 0.26  | -0.14 | 0.36  | 0.38  | -0.40 | -0.01 | -0.39 | 0.15  | 0.03  | -0.42 | -0.17 | 0.53  |
| MPO                       | 0.72  |       | 0.46  | 0.47  | -0.07 | -0.46 | 0.32  | 0.25  | 0.44  | 0.16  | 0.39  | 0.15  | -0.02 | 0.39  | 0.38  | -0.44 | -0.04 | -0.44 | 0.27  | 0.07  | -0.40 | 0.01  | 0.33  |
| cir-nDNA                  | 0.40  | 0.46  |       | 0.62  | -0.20 | -0.21 | 0.34  | 0.22  | 0.42  | -0.05 | 0.40  | 0.08  | -0.09 | 0.35  | 0.18  | -0.29 | -0.07 | -0.31 | 0.15  | 0.22  | -0.26 | -0.04 | 0.31  |
| cir-mtDNA                 | 0.36  | 0.47  | 0.62  |       | 0.13  | -0.19 | 0.18  | 0.18  | 0.30  | -0.01 | 0.54  | 0.04  | 0.03  | 0.33  | 0.19  | -0.28 | -0.15 | -0.26 | 0.34  | 0.30  | -0.26 | -0.21 | 0.35  |
| MNR                       | -0.08 | -0.07 | -0.20 | 0.13  |       | -0.04 | -0.09 | -0.06 | -0.01 | -0.03 | -0.03 | -0.05 | 0.01  | -0.23 | -0.01 | 0.25  | 0.04  | 0.31  | 0.21  | 0.16  | 0.21  | -0.30 | 0.19  |
| Calcium mmol/l            | -0.46 | -0.46 | -0.21 | -0.19 | -0.04 |       | -0.13 | -0.37 | -0.40 | 0.02  | -0.32 | -0.22 | 0.21  | -0.27 | -0.24 | 0.25  | 0.03  | 0.27  | -0.26 | 0.31  | 0.19  | 0.27  | -0.27 |
| Ferritin µg/l             | 0.15  | 0.32  | 0.34  | 0.18  | -0.09 | -0.13 |       | 0.14  | 0.21  | -0.01 | 0.26  | 0.14  | -0.05 | 0.11  | -0.02 | -0.13 | -0.10 | -0.13 | 0.03  | 0.15  | 0.06  | -0.07 | 0.12  |
| CK UI/L                   | 0.45  | 0.25  | 0.22  | 0.18  | -0.06 | -0.37 | 0.14  |       | 0.44  | -0.14 | 0.43  | 0.32  | -0.22 | 0.12  | -0.04 | -0.09 | -0.09 | -0.12 | 0.08  | -0.21 | -0.18 | -0.03 | 0.33  |
| LDH UI/L                  | 0.53  | 0.44  | 0.42  | 0.30  | -0.01 | -0.40 | 0.21  | 0.44  |       | 0.07  | 0.22  | 0.80  | -0.21 | 0.21  | 0.18  | -0.22 | -0.01 | -0.21 | 0.08  | -0.23 | -0.23 | 0.04  | 0.41  |
| PAL UI/L                  | 0.08  | 0.16  | -0.05 | -0.01 | -0.03 | 0.02  | -0.01 | -0.14 | 0.07  |       | 0.04  | 0.06  | 0.25  | 0.14  | 0.20  | -0.14 | 0.15  | -0.10 | 0.04  | 0.16  | -0.07 | 0.44  | 15e-0 |
| CRP mg/l                  | 0.46  | 0.39  | 0.40  | 0.54  | -0.03 | -0.32 | 0.26  | 0.43  | 0.22  | 0.04  | 71e-0 | 0.08  | 0.47  | 0.32  | -0.42 | -0.19 | -0.39 | 0.33  | 0.38  | -0.34 | -0.42 | 0.41  |       |
| TROPONIN T-HS (ng/l)      | 0.26  | 0.15  | 0.08  | 0.04  | -0.05 | -0.22 | 0.14  | 0.32  | 0.80  | 0.06  | 71e-0 |       | -0.20 | 0.12  | 0.11  | -0.16 | -0.01 | -0.15 | -0.06 | -0.40 | -0.15 | -0.03 | 0.44  |
| Platelets 10^9/l          | -0.14 | -0.02 | -0.09 | 0.03  | 0.01  | 0.21  | -0.05 | -0.22 | -0.21 | 0.25  | 0.08  | -0.20 |       | 0.14  | 0.40  | -0.13 | 0.29  | -0.12 | 0.17  | 0.18  | -0.12 | 0.01  | 0.04  |
| PNN %                     | 0.36  | 0.39  | 0.35  | 0.33  | -0.23 | -0.27 | 0.11  | 0.12  | 0.21  | 0.14  | 0.47  | 0.12  | 0.14  |       | 0.48  | -0.93 | -0.35 | -0.96 | 0.21  | 0.29  | -0.31 | -0.23 | 0.29  |
| PNN10^9/l                 | 0.38  | 0.38  | 0.18  | 0.19  | -0.01 | -0.24 | -0.02 | -0.04 | 0.18  | 0.20  | 0.32  | 0.11  | 0.40  | 0.48  |       | -0.55 | 0.37  | -0.54 | 0.05  | 0.28  | -0.24 | -0.46 | 0.64  |
| Lymphocyte %              | -0.40 | -0.44 | -0.29 | -0.28 | 0.25  | 0.25  | -0.13 | -0.09 | -0.22 | -0.14 | -0.42 | -0.16 | -0.13 | -0.93 | -0.55 |       | 0.38  | 0.97  | -0.23 | -0.27 | 0.31  | 0.25  | -0.45 |
| Lymphocyte 10^9/l         | -0.01 | -0.04 | -0.07 | -0.15 | 0.04  | 0.03  | -0.10 | -0.09 | -0.01 | 0.15  | -0.19 | -0.01 | 0.29  | -0.35 | 0.37  | 0.38  |       | 0.31  | -0.19 | -0.06 | 0.10  | -0.05 | 0.13  |
| Lymph/PNN Ratio           | -0.39 | -0.44 | -0.31 | -0.26 | 0.31  | 0.27  | -0.13 | -0.12 | -0.21 | -0.10 | -0.39 | -0.15 | -0.12 | -0.96 | -0.54 | 0.97  | 0.31  |       | -0.21 | -0.24 | 0.29  | 0.28  | -0.43 |
| TCA /TCK Ratio            | 0.15  | 0.27  | 0.15  | 0.34  | 0.21  | -0.26 | 0.03  | 0.08  | 0.08  | 0.04  | 0.33  | -0.06 | 0.17  | 0.21  | 0.05  | -0.23 | -0.19 | -0.21 |       | -0.08 | -0.20 | -0.17 | -0.01 |
| Fibrinogen (activity) g/l | 0.03  | 0.07  | 0.22  | 0.30  | 0.16  | 0.31  | 0.15  | -0.21 | -0.23 | 0.16  | 0.38  | -0.40 | 0.18  | 0.29  | 0.28  | -0.27 | -0.06 | -0.24 | -0.08 |       | -0.24 | -0.22 | 0.09  |
| CCI Lupus                 | -0.42 | -0.40 | -0.26 | -0.26 | 0.21  | 0.19  | 0.06  | -0.18 | -0.23 | -0.07 | -0.34 | -0.15 | -0.12 | -0.31 | -0.24 | 0.31  | 0.10  | 0.29  | -0.20 | -0.24 |       | -0.10 | -0.07 |
| Antithrombin activity %   | -0.17 | 0.01  | -0.04 | -0.21 | -0.30 | 0.27  | -0.07 | -0.03 | 0.04  | 0.44  | -0.42 | -0.03 | 0.01  | -0.23 | -0.46 | 0.25  | -0.05 | 0.28  | -0.17 | -0.22 | -0.10 |       | -0.47 |
| D-dimers ng/ml            | 0.53  | 0.33  | 0.31  | 0.35  | 0.19  | -0.27 | 0.12  | 0.33  | 0.41  | 15e-0 | 0.41  | 0.44  | 0.04  | 0.29  | 0.64  | -0.45 | 0.13  | -0.43 | -0.01 | 0.09  | -0.07 | -0.47 |       |

**Figure 2S. NETs markers normalized by PNN for COVID-19 patients and healthy individuals.**

(A) Comparison of NETs biomarkers in healthy, non-severe, severe and PAP COVID-19 cohorts. The values are medians with upper and lower limits. Note, for clarity P values level when comparing with HI are omitted but they are all significant vs NS, S and PAP for each biomarker; (B) Associations of NETs biomarkers in non-severe and severe COVID-19 patients and PAP cohort. **The conclusions drawn on the association of NET biomarkers with disease severity do not depend on the number of polymorphonuclear neutrophils (PNN).**

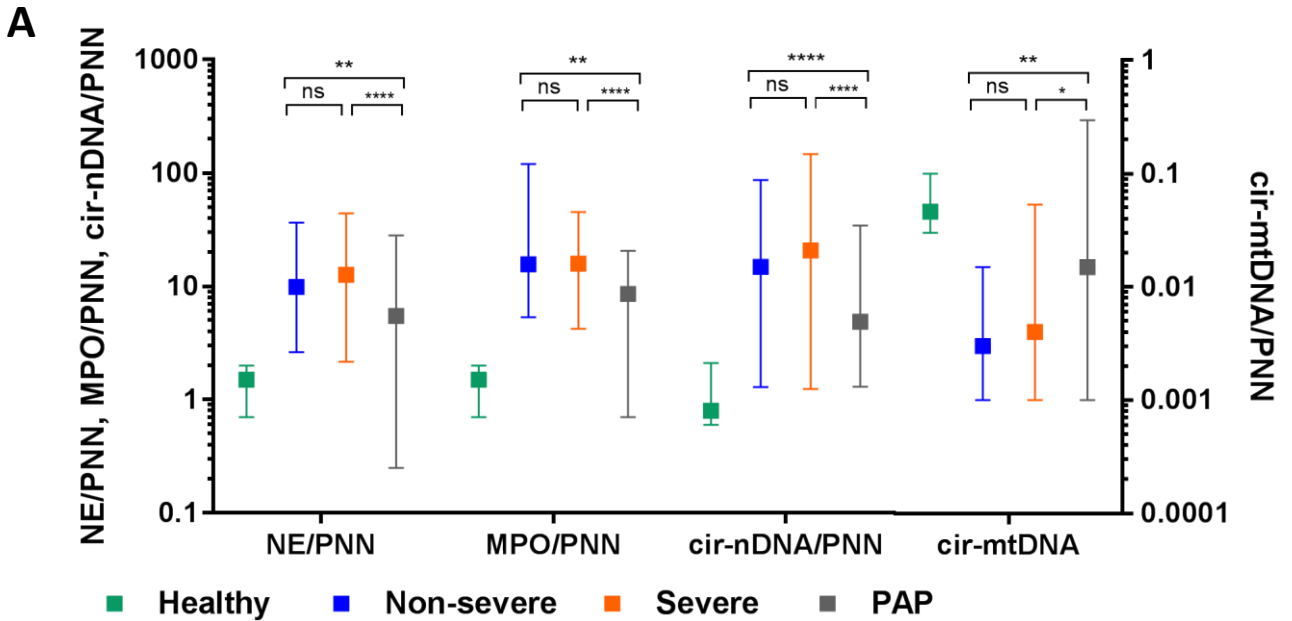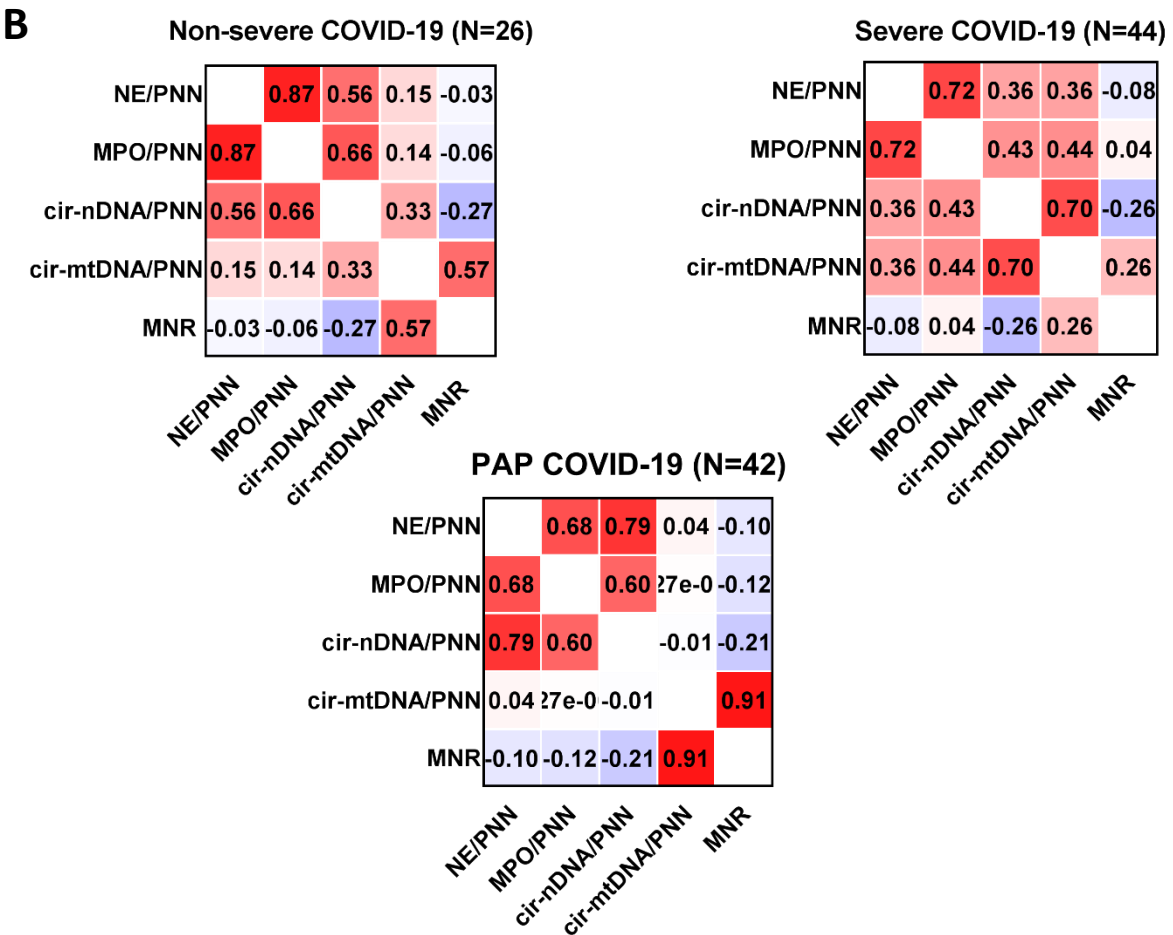

**Figure 3S. NETs markers for COVID-19 patients and healthy individuals.** There are individual values with medians for NE, MPO, cir-nDNA (A) and cir-mtDNA, MNR (B). «COVID-19 all» group is combination of non-severe and severe COVID-19 patients. «COVID-19 all» group's values for NETs biomarkers are between non-severe and severe COVID-19 cohorts.

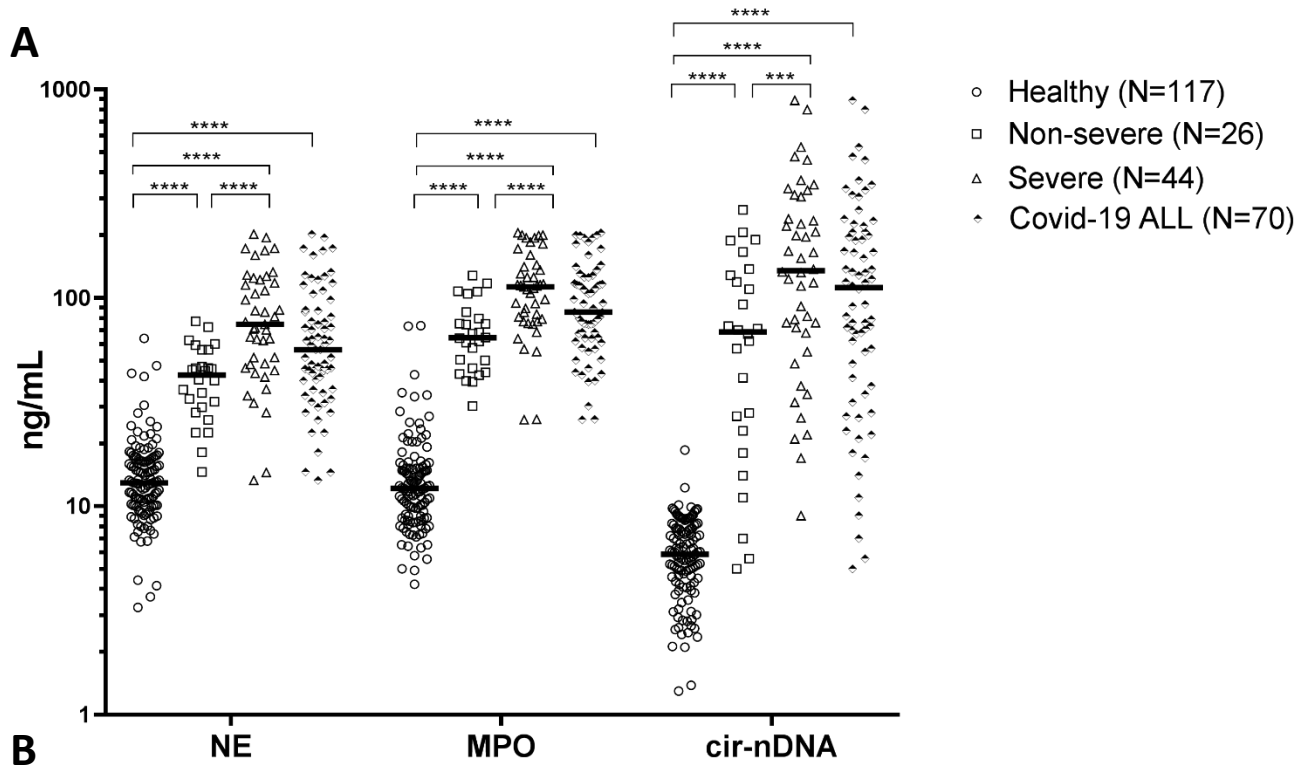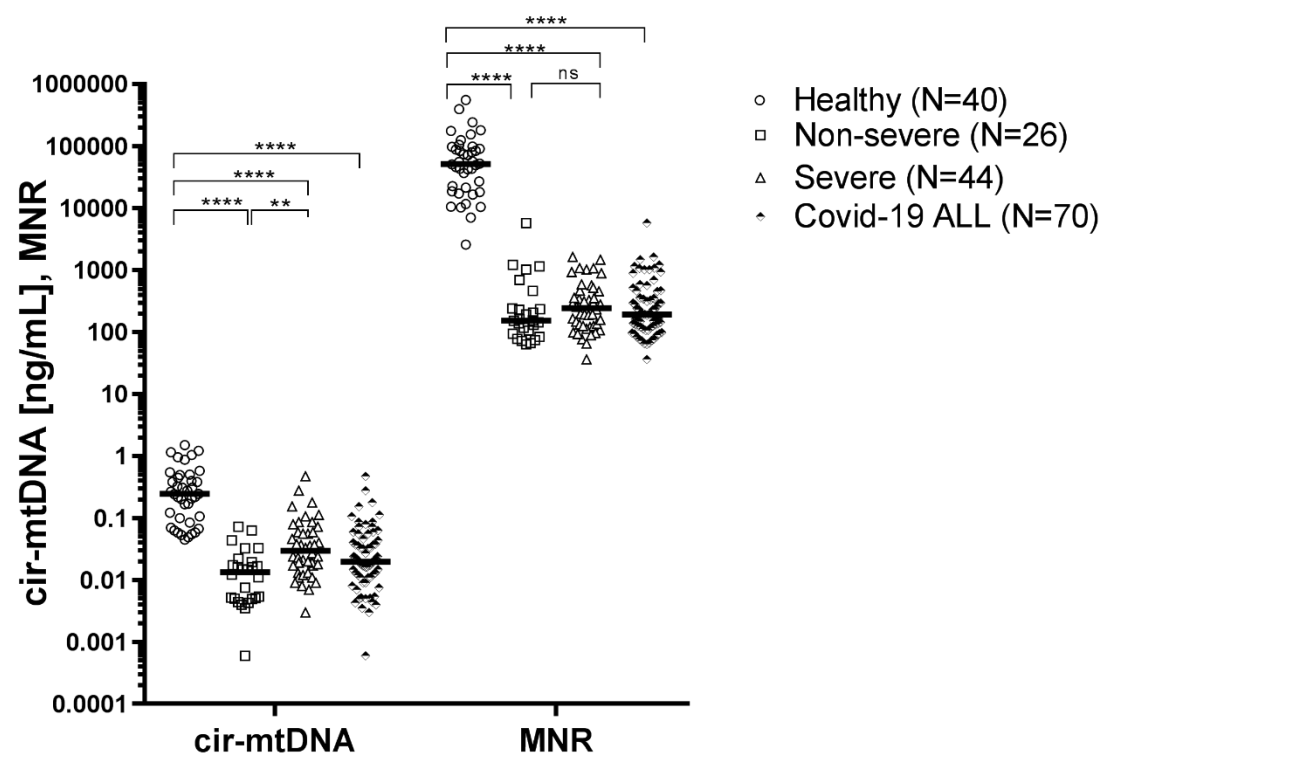

### Figure 4S. ROC for NETs markers.

Performance characteristics of the NETs biomarkers for COVID-19. ROC curves for NE, MPO, cir-nDNA, cir-mtDNA concentrations and MNR between healthy individuals and COVID-19 patients (combining both NS and S COVID-19 patient cohorts). ROC: receiver operating characteristics; AUC: area under curve; NE: neutrophil elastase; MPO: myeloperoxidase; cirDNA: circulating cell-free DNA; cir-mtDNA: circulating cell-free DNA of mitochondrial origin; MNR: ratio of mitochondrial to nuclear circulating DNA concentration.

#### Non-severe + severe COVID-19 (N=70) vs healthy (N=117)

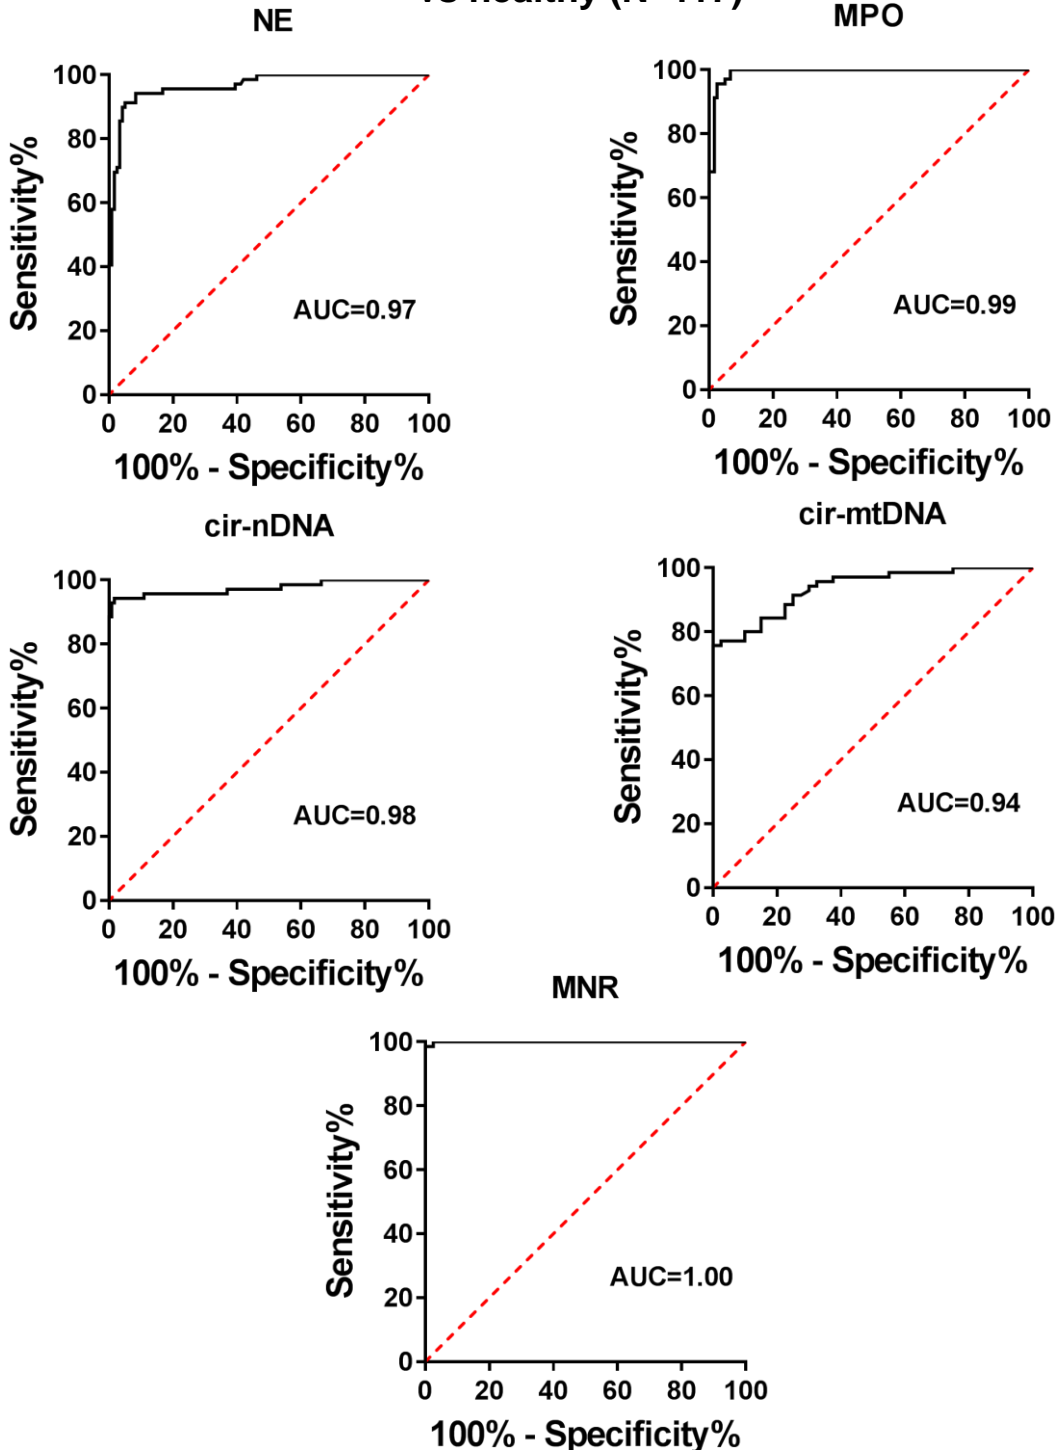

### Figure 5S. ROC for NETs markers.

Performance characteristics of the NETs biomarkers for COVID-19. ROC curves for NE, MPO, combined NE+MPO, cir-nDNA, cir-mtDNA concentrations and MNR between non-severe and severe COVID-19 patients. ROC: receiver operating characteristics; AUC: area under curve; NE: neutrophil elastase; MPO: myeloperoxidase; cirDNA: circulating cell-free DNA; cir-mtDNA: circulating cell-free DNA of mitochondrial origin; MNR: ratio of mitochondrial to nuclear circulating DNA concentration.

#### Non-severe COVID-19 (N=26) vs severe COVID-19 (N=44)

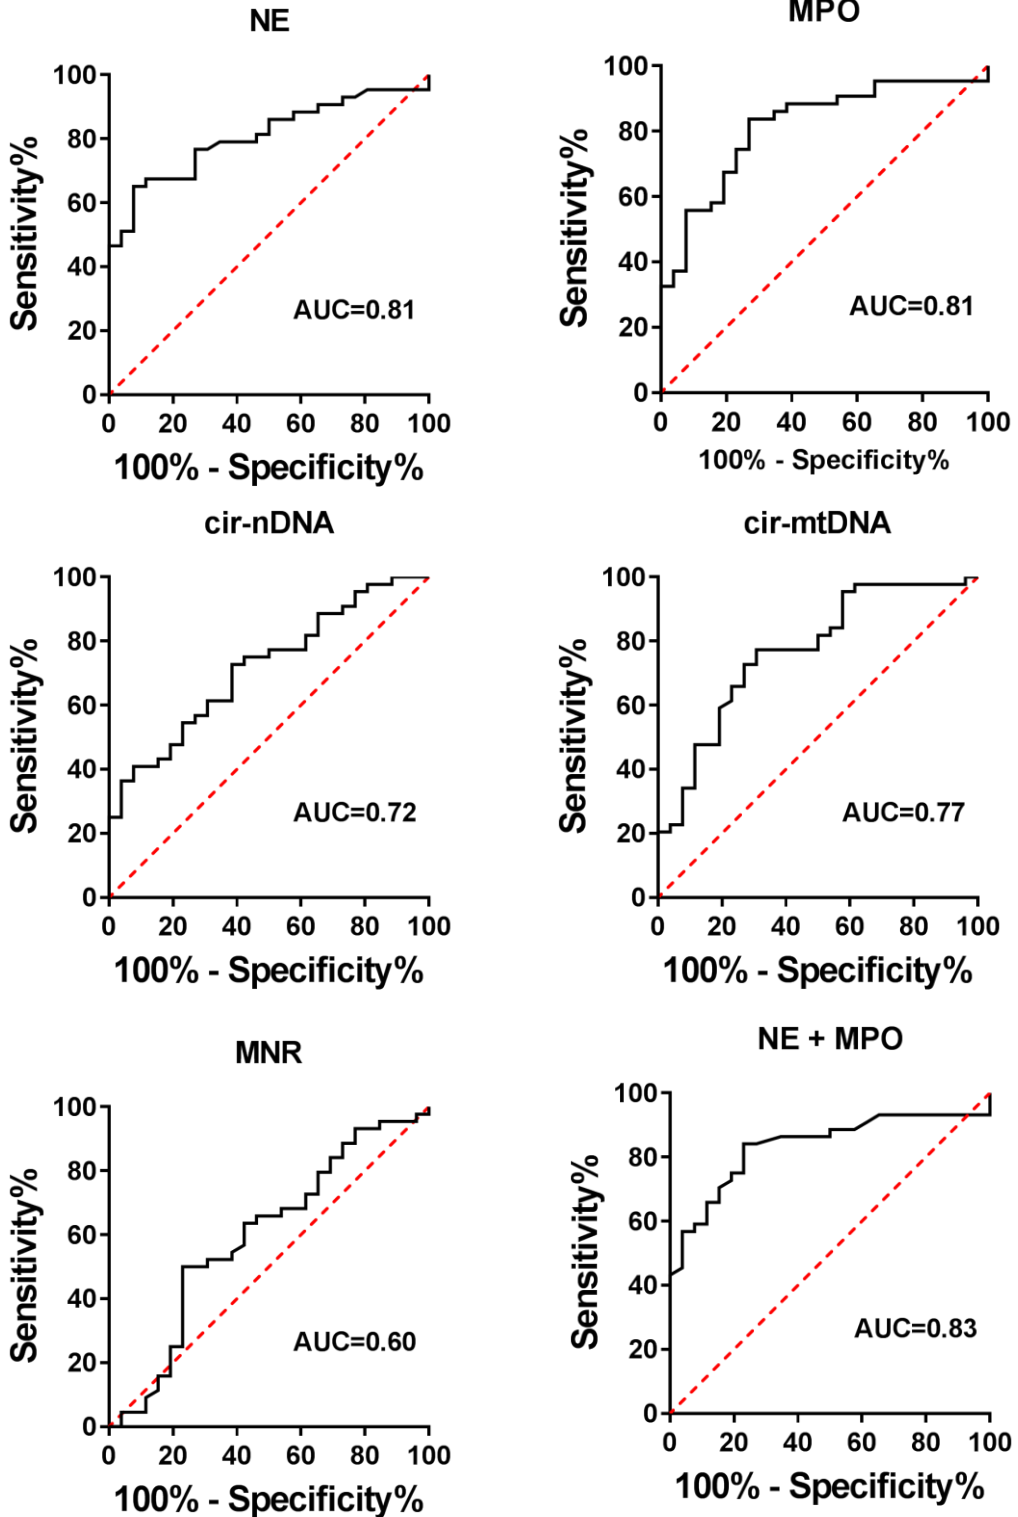

### Figure 6S. ROC for NETs markers (NE+MPO).

Performance characteristics of the NETs biomarkers for COVID-19. ROC curves for combined NE+MPO between healthy individuals and non-severe, severe, post-acute (PAP) COVID-19 patients. ROC: receiver operating characteristics; AUC: area under curve; NE: neutrophil elastase; MPO: myeloperoxidase; cirDNA: circulating cell-free DNA; cir-mtDNA: circulating cell-free DNA of mitochondrial origin; MNR: ratio of mitochondrial to nuclear circulating DNA concentration.

## NE + MPO concentration COVID-19 vs healthy

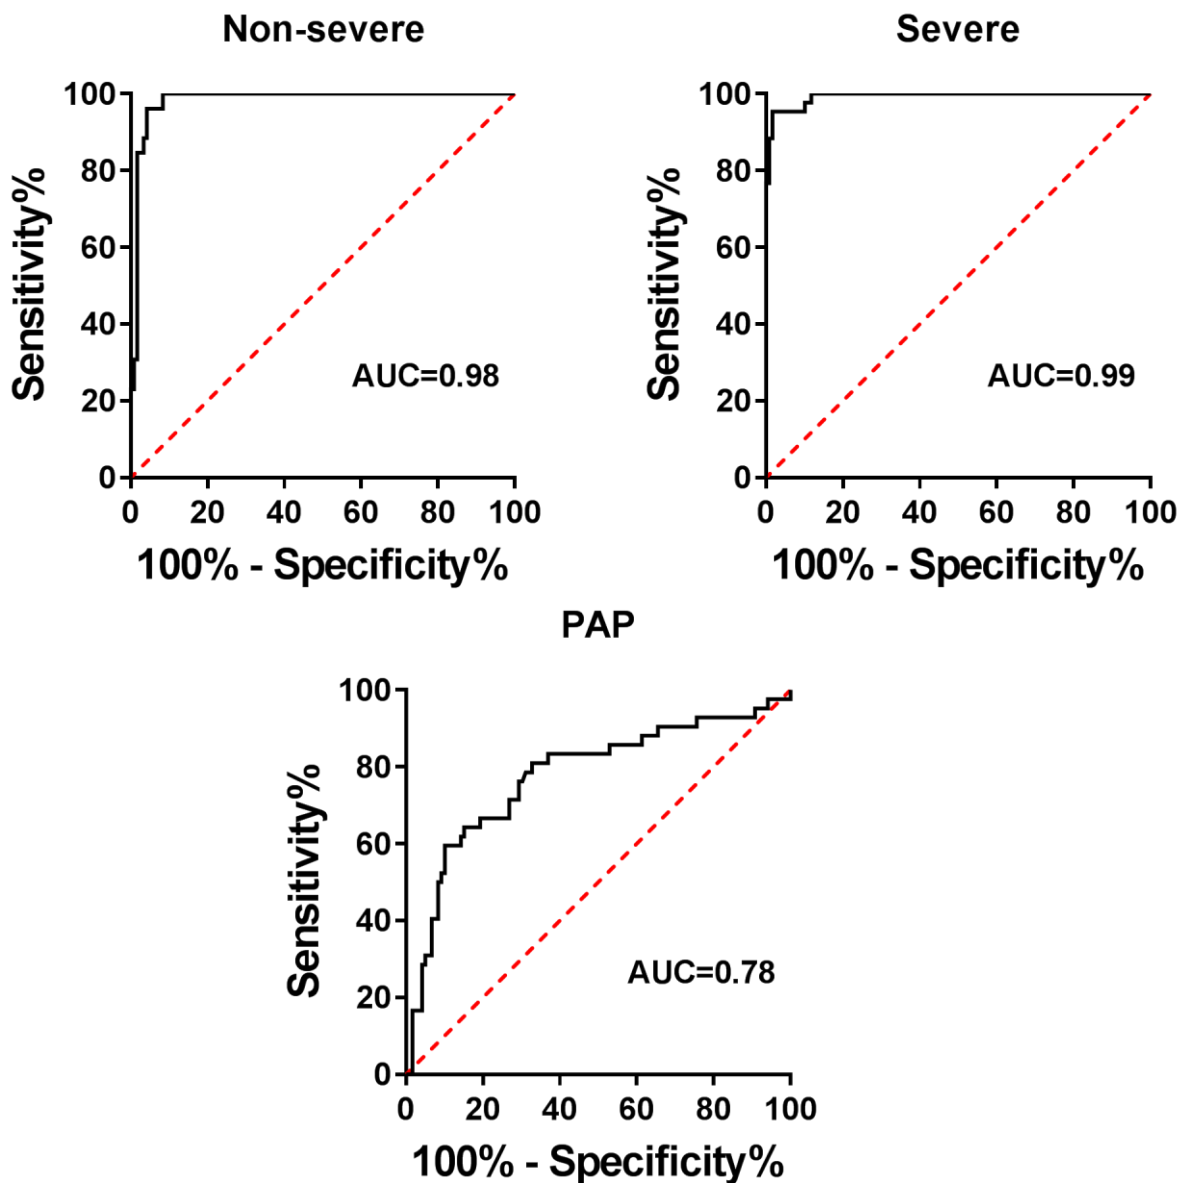



**Figure 7S. Prevalence and number of patients positive to aCL and anti-B2GP autoantibodies in the NS, S and PAP cohorts**

| <b>N</b>                       | <b>aCL IgG</b> | <b>aCL IgM</b> | <b>aCL IgG + IgM</b> | <b>antiB2GP IgG</b> | <b>antiB2GP IgM</b> | <b>antiB2GP IgG + IgM</b> | <b>Both aCL and antiB2GP</b> | <b>aCL or antiB2GP</b> |
|--------------------------------|----------------|----------------|----------------------|---------------------|---------------------|---------------------------|------------------------------|------------------------|
| <b>Non-severe (N=18)</b>       | 1              | 6              | 6                    | 1                   | 1                   | 2                         | 1                            | 7                      |
| <b>Severe (N=39)</b>           | 5              | 7              | 9                    | 3                   | 4                   | 4                         | 4                            | 9                      |
| <b>Post-acute phase (N=42)</b> | 4              | 4              | 6                    | 3                   | 3                   | 5                         | 3                            | 8                      |
| <b>%</b>                       | <b>aCL IgG</b> | <b>aCL IgM</b> | <b>aCL IgG + IgM</b> | <b>antiB2GP IgG</b> | <b>antiB2GP IgM</b> | <b>antiB2GP IgG + IgM</b> | <b>Both aCL and antiB2GP</b> | <b>aCL or antiB2GP</b> |
| <b>Non-severe (N=18)</b>       | 5.6            | 33.3           | 33.3                 | 5.6                 | 5.6                 | 11.1                      | 5.6                          | 38.9                   |
| <b>Severe (N=39)</b>           | 12.8           | 17.9           | 23.1                 | 7.7                 | 10.3                | 10.3                      | 10.3                         | 23.1                   |
| <b>Post-acute phase (N=42)</b> | 9.5            | 9.5            | 14.3                 | 7.1                 | 7.1                 | 11.9                      | 7.1                          | 19                     |
